# Supplementary material for: In situ Hf isotope analysis of cassiterite by LA-MC-ICP-MS: protocol and applications
Source: Royal Society of Chemistry journal article supplement (doi:10.1039/d2ja00340f), 2022-12-20
Supplement: d2ja00340f1.xlsx [file d2ja00340f1.xlsx]

## Sheet: Cassiterite trace element Data
Sample	Unit	Sc	Ti	Zr	Nb	La	Ce	Pr	Nd	Sm	Eu	Gd	Tb	Dy	Ho	Er	Tm	Yb	Lu	Hf	Ta	W	Pb	Th	U	HFSE	Yb/Hf	Lu/Hf
Rond-A
Rond-A-01	μg g-1	260.6	604	571.7	7780	0.0067782	0.0021	0.0005	0.0033675	0.0069	0.0015	1.317	0.1123	0.0059	0.0039	0.046	0.0286	0.622	0.1683	184.8	12660	35.27	7e-05	0.00042	2.318	21800.5	0.0033658	0.000910714
Rond-A-02	μg g-1	286.1	583.2	576.3	7925	0.0068757	0.0007	0.0018	0.00445	0.0086	0.00225	1.277	0.0993	0.0141	0.0038	0.0486	0.0263	0.758	0.185	185.7	16140	34.29	0.0033	0.00117	2.329	25410.2	0.00408185	0.00099623
Rond-A-03	μg g-1	240.6	560.7	576.4	7960	0.0047	0.0013	0.001	0.0038385	0.0082	0.0003	1.27367	0.113	0.0054	0.003	0.0437	0.027	0.64	0.154	175.2	9770	47.14	0.0011	0.00081	2.382	19042.3	0.00365297	0.000878995
Rond-A-04	μg g-1	309.9	679	619.8	12120	0.0071638	0.003	0.0023	0.00354	0.0085	0.0004	1.33633	0.1137	0.0117	0.0052	0.0553	0.0301	0.724	0.1779	181.5	7820	166.6	2e-05	0.0003	3.656	21420.3	0.00398898	0.000980165
Rond-A-05	μg g-1	302.1	698	634.6	11840	0.0052	0.0081	0.0003	0.00415	0.0187	0.0011	1.32033	0.1177	0.0105	0.0038	0.0456	0.0265	0.652	0.1681	181.6	7670	151.6	0.00023	0.00051	3.521	21024.2	0.00359031	0.000925661
Rond-A-06	μg g-1	335.9	742	678	12480	0.0074856	0.0109	0.0032	0.00505	0.0091	0.0017	1.339	0.1114	0.0167	0.0044	0.0458	0.029	0.806	0.1965	193	9580	148.4	0.0039	0.00075	3.692	23673	0.00417617	0.00101813
Rond-A-07	μg g-1	286.9	590	656	11040	0.0076197	0.0144	0.0018	0.0035	0.0095	0.002135	1.40067	0.1281	0.0128	0.0036	0.061	0.0264	0.683	0.189	173.5	7370	133.1	0.054	0.0162	3.301	19829.5	0.0039366	0.00108934
Rond-A-08	μg g-1	288.3	627.7	674.2	9990	0.0077117	0.0215	0.0036	0.01145	0.0123	0.00015	1.38733	0.1179	0.0146	0.0046	0.0427	0.0283	0.754	0.181	192.3	8860	72.36	0.064	0.079	2.982	20344.2	0.00392096	0.000941238
Rond-A-09	μg g-1	332.9	1385	792.9	3219	0.009	0.0157	0.0043	0.0071	0.0091	0.0014	1.40833	0.129	0.0086	0.0015	0.0263	0.0151	0.323	0.0989	196.2	1937	69.9	0.0369	0.0169	4.222	7530.1	0.00164628	0.000504077
Rond-A-10	μg g-1	296.2	680.9	652	11420	0.0061	0.0086	0.0027	0.003	0.0256	0.0008	1.40367	0.122	0.0197	0.0062	0.06	0.0282	0.717	0.179	177.5	7078	136.1	0.355	0.239	3.643	20008.4	0.00403944	0.00100845
RG-114
RG-114-01	μg g-1	4.66	2347.5	475.4	824	0.0011	0.001	0.0024	0.000759733	0.0007	0.00085	1.29933	0.0979	0.0075	9.116e-05	0.00025	5.262e-05	0.0003	0.00011	73.2	73.3	23.87	0.0083	0.00016	0.514	3793.4	4.09836e-06	1.50273e-06
RG-114-02	μg g-1	11.71	3570	688	2290	0.00459208	0.0003	0.0021	0.00234055	0.0025	3e-05	1.30067	0.0932	0.0078	8.712e-05	0.00025	0.0001787	0.0033	0.00064	135.9	68.8	45.98	0.036	2.02038e-06	2.319	6752.7	2.42826e-05	4.70935e-06
RG-114-03	μg g-1	12.47	4337.5	672	3410	0.0045753	0.0116	0.0005	0.002	0.0013	0.00011	1.34633	0.1103	0.008	8.309e-05	0.00051	0.00018361	0.0026	0.0009	106.9	154.1	127.1	0.052	0.00145	1.091	8680.5	2.43218e-05	8.41908e-06
RG-114-04	μg g-1	7.71	4495.5	682	4973	0.0045581	0.0088	0.0009	0.00599113	0.0025	4e-05	1.33133	0.107	0.0003	7.898e-05	0.00037257	0.0001	0.0006	0.00026	176.8	1814	66.9	0.09	0.0206	4.33	12141.3	3.39367e-06	1.47059e-06
RG-114-05	μg g-1	6.46	3800	608	3506	0.0104	0.0019	0.0025	0.00174141	0.0048	0.0009	1.36733	0.115	0.0068	7.493e-05	0.00035855	0.00011	0.0029	0.0005	146.1	1732	36.92	0.0253	0.0027	2.237	9792.1	1.98494e-05	3.42231e-06
RG-114-06	μg g-1	4.36	2377	507.4	15670	0.0026	0.0108	0.0015	0.00445	0.0025	0.0019	1.43933	0.1155	0.005	7.089e-05	0.00025	5.0752e-05	0.0003	0.00027	124.6	8050	239.8	0.0137	0.0032	3.07	26729	2.4077e-06	2.16693e-06
RG-114-07	μg g-1	3.57	1562.5	421	7420	0.0049	0.0068	0.0008	0.0038	0.00192006	0.0017	1.53833	0.129	0.0011	6.679e-05	0.0004	0.00011	0.0014	0.0025	131.5	4717	60.9	0.051	0.00023	1.157	14252	1.06464e-05	1.90114e-05
RG-114-08	μg g-1	4.88	2354.5	523.3	14220	0.00450002	0.0064	0.0009	0.00499226	0.0012	0.00073	1.564	0.13	0.0036	6.276e-05	0.00031648	0.000188909	0.0023	0.00095	144.1	6290	144.2	0.0065	1.87259e-06	2.124	23531.9	1.59611e-05	6.59264e-06
RG-114-09	μg g-1	4.41	2393.5	540.8	15410	0.014	0.0101	0.0026	0.0068	0.005	0.0002	1.639	0.136	0.006	8e-05	0.00030235	6e-05	0.0007	0.00023	129.8	3880	161.4	0.0556	0.00079	2.821	22354.1	5.39291e-06	1.77196e-06
RG-114-10	μg g-1	9.58	3955	632	12200	0.00448262	0.0177	0.0002	0.0041	0	0.000335	1.59667	0.1343	0.009	0.00016	0.00028801	0.00018142	0.0023	0.00092	148.2	15420	121.5	0.0076	0.00037	2.594	32355.2	1.55196e-05	6.20783e-06
Kard
Kard-01	μg g-1	1.533	2993	455.8	143.5	0.0011	0.0095	0.0029	0.008	0.0073	0.00031	1.41433	0.122	0.0051	0.00139617	0.0029998	0.000804	0.0054	0.0004	133.2	484.4	11.49	0.0017	0.0041	1.526	4209.9	4.05405e-05	3.003e-06
Kard-02	μg g-1	1.651	2974	468	176.6	0.0044	0.0121	0.0029	0.005	0.0083	0.0019	1.416	0.122	0.0033	0.00044	0.0042	0.00097	0.0106	0.0008	141.3	673	11.96	0.0295	0.012	1.517	4432.9	7.50177e-05	5.66171e-06
Kard-03	μg g-1	1.82	3005	500	163.1	0.0344	0.189	0.0232	0.082	0.074	0.0255	1.66867	0.202	0.614	0.144	0.494	0.0815	0.618	0.0809	141.9	607	38.2	2.55	0.171	2.775	4417	0.00435518	0.00057012
Kard-04	μg g-1	1.602	2992.5	452.7	176.1	0.0108	0.0286	0.0022	0.01325	0.0059	0.00395	1.49733	0.135	0.045	0.0135	0.043	0.0057	0.052	0.0065	134.8	633	15.26	0.95	0.0215	1.564	4389.1	0.000385757	4.82196e-05
Kard-05	μg g-1	1.19	1714.5	412	207.2	0.034	0.0601	0.0094	0.043	0.0242	0.00735	1.61433	0.153	0.195	0.041	0.134	0.029	0.207	0.027	138.8	1654	20.2	1.13	0.0937	1.394	4126.5	0.00149135	0.000194524
Kard-06	μg g-1	1.458	2649.5	439	199.9	0.0111	0.026	0.0065	0.00495	0.0055	0.00205	1.53833	0.148	0.017	0.0009	0.002	0.00082	0.0071	0.0012	143	1590	13	0.0243	0.0354	1.501	5021.4	4.96503e-05	8.39161e-06
Kard-07	μg g-1	1.103	1595	254	168.2	0.043	0.17	0.0121	0.072	0.071	0.0241	1.81067	0.212	0.554	0.128	0.423	0.0749	0.582	0.0768	183	1617	16.4	1.38	0.175	1.489	3817.2	0.00318033	0.000419672
BB#7
BB#7-01	μg g-1	12.22	4140	5970	61600	0.02	0.091	0.021	0.0745	0.015	0.00325	2.48667	0.229	0.017	0.00058	0.0017	0.0011	0.005	0.0044	1483	60900	229	1.55	0.00128	55.5	134093	3.37154e-06	2.96696e-06
BB#7-02	μg g-1	11.22	4400	5560	58300	0.011652	0.0105	0.0045	0.0095	0.0082	0.0015	2.63	0.225	0.02	0.00083	0.0021	0.00064	0.01	0.0031	1222	44500	278.5	0.0123	0.00046	47.8	113982	8.18331e-06	2.53682e-06
BB#7-03	μg g-1	10.22	4470	5060	37190	0.0038	0.0174	0.001	0.00145	0.003	0.0037	2.50333	0.209	0.017	0.0007334	0.00045	0.00053568	0.0053	0.0015	1062	28770	175.2	0.116	0.00047	36.29	76552	4.99058e-06	1.41243e-06
BB#7-04	μg g-1	0.81	536	386	2690	0.081	0.161	0.043	0.1035	0.019	0.0054	0.44	0.038	0.025	0.0025	0.0034	0.0011	0.001	0.0025	94	2310	8.4	0.644	0.0217	4.27	6016	1.06383e-05	2.65957e-05
BB#7-05	μg g-1	3.87	2221	2037	38800	0.009266	0.01	0.0043	0.0023	0.0006	0.002	1.90067	0.15	0.011	0.00064	0.0008	0.000603013	0.0021	0.0012	264.3	7690	148.8	0.0052	0.000191976	31.8	51012.3	7.94552e-06	4.5403e-06
BB#7-06	μg g-1	1.18	813	547	11970	0.033	0.088	0.0238	0.0685	0.0025	0.00475	0.766333	0.075	0.0115	0.00025	0.0026	0.00052	0.0041	0.00122	53.4	1046	37	0.263	0.0088	10.06	14429.4	7.6779e-05	2.28464e-05
BB#7-07	μg g-1	7.84	2836	4172	38900	0.008082	0.016	0.0027	0.0103	0.0029	0.00185	1.936	0.16	0.009	0.00068	0.0026	0.000625888	0.0026	0.0036	900	32680	161.5	0.0085	0.0029	25.01	79488	2.88889e-06	4e-06
BB#7-08	μg g-1	1.43	798	771	13810	0.007	0.0066	0.0037	0.00635	0.0021	0.001185	0.695333	0.065	0.0033	0.00051982	0.0001989	0.0003	0.0003	0.0015	98.8	2880	47.5	0.0059	0.00039	10.92	18357.8	3.03644e-06	1.51822e-05
BB#7-09	μg g-1	1.73	1461	942	24000	0.007203	0.0181	0.0072	0.0128	0.0026	0.00245	1.51867	0.133	0.0104	0.00071	0.0009	0.00049	0.0041	0.0015	83.8	1770	82.5	0.0186	0.00122	19.4	28256.8	4.8926e-05	1.78998e-05
BB#7-10	μg g-1	5.54	2448	2815	20330	0.0075	0.0061	0.0022	0.0020235	0.003	0.00083	1.33967	0.1156	0.0014	0.00032	0.0019	0.000375126	0.0036	0.0021	594	17450	94.1	0.00096	0.00043	17.57	43637	6.06061e-06	3.53535e-06
BB#7-11	μg g-1	5.48	2453.5	2886	20500	0.00513127	0.0036	0.0029	0.00375	0.0005	0.00125	1.38833	0.116	0.0014	0.00055	0.00071	0.00025	0.0041	0.00116	614	17900	93.6	0.0047	0.0007	17.45	44353.5	6.67752e-06	1.88925e-06
BB#7-12	μg g-1	2.129	1473	1127	25260	0.00512815	0.0096	0.0011	0.00352141	0.0024	0.000565	1.418	0.1231	0.0025	0.00023	0.00046	0.000280623	0.0007	0.00122	125.8	3647	94.5	0.00014	2.6706e-06	16.65	31632.8	5.56439e-06	9.69793e-06
BB#7-13	μg g-1	5.2	2207	2695	24770	0.00513484	0.0081	0.0018	0.0067	0.0034	0.00012	1.40233	0.1175	0.0156	0.00046	0.00023	0.00028373	0.0007	0.00113	541	18420	130.5	0.0035	0.00128	19.8	48633	1.2939e-06	2.08872e-06
BB#7-14	μg g-1	2.541	1566	1342	26710	0.00514923	0.0096	0.0021	0.00106904	0.0033	0.00012	1.464	0.127	0.0004	0.00031	0.0002668	0.00018723	0.0011	0.00132	167.3	5340	103.8	0.002	0.00028	18.37	35125.3	6.57501e-06	7.89002e-06
BB#7-15	μg g-1	0.896	1171	457	15750	0.00516996	0.0095	0.0054	0.0049	0.0015	0.00035	1.51833	0.129	0.0012	0.00036348	0.00023	0.00019132	0.0024	0.0011	27.22	447	51	0.0011	0.00041	10.92	17852.2	8.81705e-05	4.04115e-05
19MP
19MP-01	μg g-1	21.25	196.35	456	1047	0.0025	0.001	0.0005	0.0042	0.0039	0.000465	1.57233	0.14	0.003	0.00094	0.0047	0.00143	0.055	0.0137	101.2	243.5	1555	1.075	0.00022	7.15	2044.05	0.000543478	0.000135375
19MP-02	μg g-1	124.5	634.2	545	1447	0.0014	0.027	0.0019	0.0041	0.0033	0.00075	1.49967	0.1256	0.012	0.0047	0.0264	0.0102	0.164	0.0365	79.1	864	2741	0.78	0.0167	15.28	3569.3	0.00207332	0.000461441
19MP-03	μg g-1	72.3	506.6	597.8	248.1	0.0035	0.0217	0.0022	0.00145	0.0062	0.00045	1.613	0.14	0.0035	0.00157	0.0095	0.0035	0.056	0.0152	156.9	743	44.2	0.064	0.0215	3.435	2252.4	0.000356915	9.6877e-05
19MP-04	μg g-1	77.3	295.45	773	3158	0.0039	0.0094	0.0007	0.0043	0.0038	0.00034787	1.653	0.15	0.0073	0.0034	0.0151	0.0151	0.238	0.0549	164.6	692	2973	0.011	0.0003777	8.85	5083.05	0.00144593	0.000333536
19MP-05	μg g-1	50.93	269.3	1155	2129	0.0089647	0.0072	0.0019	0.00199336	0.0023	0.00065	1.687	0.1483	0.0022	0.0027	0.0194	0.0079	0.208	0.0428	251.5	1092	6514	0.014	0.00118	62.27	4896.8	0.000827038	0.000170179
19MP-06	μg g-1	68	196.9	609.5	2223	0.0043	0.0022	0.0006	0.00149334	0.0068	0.000415	1.71433	0.159	0.0155	0.00221	0.0145	0.0088	0.181	0.0389	104	1630	2453	0.118	7e-05	5.9	4763.4	0.00174038	0.000374038
19MP-07	μg g-1	34.87	356.9	787	2287	0.0005	0.0028	0.0006	0.00160668	0.003	0.000565	1.80533	0.157	0.0009	0.0023	0.0142	0.0102	0.133	0.0312	138.5	264.5	6500	0.0014049	0.00121	38.65	3833.9	0.000960289	0.000225271
19MP-08	μg g-1	65.2	563	579.8	3472	0.0061	0.0085	0.0011	0.0015	0.0076	0.0005	1.82933	0.151	0.0012	0.0035	0.0291	0.0134	0.222	0.0506	96.2	608	7740	0.044	0.0063	22.53	5319	0.00230769	0.000525988
19GX
19GX-01	μg g-1	4.65	7765	760	3.68	0.0038	0.0793	0.0116	0.028	0.0189	0.00045	1.361	0.114	0.0193	0.0043	0.016	0.0031	0.06	0.0136	112	0.334	90	0.0301	0.0079	14.5	8641.01	0.000535714	0.000121429
19GX-02	μg g-1	9.03	11165	830	40.11	0.015	0.125	0.0154	0.0535	0.0105	0.000185	1.39567	0.1133	0.027	0.0051	0.0228	0.0062	0.108	0.0242	112.8	9.11	194.7	0.0269	0.0035	10.25	12157	0.000957447	0.000214539
19GX-03	μg g-1	3.84	5945	977	13.03	0.0053	0.0395	0.0049	0.0136	0.0066	0.000165	1.37567	0.117	0.0092	0.00125	0.0077	0.0027	0.045	0.0142	131.8	0.636	65.6	0.0252	0.0069	20.73	7067.47	0.000341426	0.000107739
19GX-04	μg g-1	8.52	8380	898	16.41	0.017	0.096	0.0112	0.045	0.0071	0.000285	1.33433	0.109	0.0164	0.00116	0.0145	0.0026	0.05	0.0136	111.4	0.612	57.91	0.0277	0.00176	21.39	9406.42	0.000448833	0.000122083
19GX-05	μg g-1	2.194	8115	971	99.4	0.033	0.244	0.0292	0.0815	0.0197	0.000545	1.43733	0.116	0.036	0.0059	0.0205	0.0044	0.056	0.0151	170.1	10.55	8930	0.0097	0.0011	42.36	9366.05	0.000329218	8.87713e-05
19GX-06	μg g-1	4.24	7735	831	21.58	0.009	0.088	0.0116	0.0275	0.0072	0.0005	1.383	0.114	0.0077	0.00108	0.0079	0.0028	0.035	0.0061	136.3	3.291	75.7	0.0422	0.0616	4.65	8727.17	0.000256787	4.47542e-05
19GX-07	μg g-1	7.12	8515	1039	23.09	0.015	0.133	0.021	0.0335	0.0099	0.0002	1.45933	0.12	0.0137	0.0054	0.0218	0.0067	0.058	0.0171	129	0.942	72.7	0.0253	0.0041	28.48	9707.03	0.000449612	0.000132558
19GX-08	μg g-1	4.98	9040	746	16.14	0.0074	0.096	0.017	0.0415	0.0152	0.00085	1.45167	0.122	0.0092	0.00164	0.0123	0.0022	0.041	0.0134	100.6	1.891	226.8	0.0268	0.00087	10.51	9904.63	0.000407555	0.000133201
19GX-09	μg g-1	7.47	11360	853	13.85	0.006	0.106	0.0104	0.037	0.0099	0.0002	1.51433	0.126	0.027	0.0037	0.0139	0.0059	0.118	0.0241	104.9	0.662	288.6	0.0214	0.00099	15.58	12332.4	0.00112488	0.000229743
19GX-10	μg g-1	2.298	8455	794	285.6	0.0067115	0.0169	0.0034	0.00449365	0.0033	0.00043	1.48367	0.128	0.0028	0.00122	0.0044	0.0033	0.068	0.0138	86.8	16.93	7200	0.013	0.0162	39.7	9638.33	0.00078341	0.000158986
Y724
Y724-01	μg g-1	300	6830	909	3280	0.0038	0.0793	0.0116	0.028	0.0189	0.00045	1.361	0.114	0.0193	0.0043	0.016	0.0031	0.06	0.0136	127.7	1272	8430	1.66	0.279	284	12418.7	0.000469851	0.0001065
Y724-02	μg g-1	186.5	3270	788	2970	0.015	0.125	0.0154	0.0535	0.0105	0.000185	1.39567	0.1133	0.027	0.0051	0.0228	0.0062	0.108	0.0242	95.9	633	3091	1.263	0.591	207.4	7756.9	0.00112617	0.000252346
Y724-03	μg g-1	444	10860	904	2913	0.0053	0.0395	0.0049	0.0136	0.0066	0.000165	1.37567	0.117	0.0092	0.00125	0.0077	0.0027	0.045	0.0142	121.1	432	2110	0.574	0.13	350	15230.1	0.000371594	0.000117258
Y724-04	μg g-1	112.1	3970	568	3276	0.017	0.096	0.0112	0.045	0.0071	0.000285	1.33433	0.109	0.0164	0.00116	0.0145	0.0026	0.05	0.0136	87.2	1752	1110	1.88	0.456	52.2	9653.2	0.000573394	0.000155963
Y724-05	μg g-1	243.1	6840	980	2662	0.033	0.244	0.0292	0.0815	0.0197	0.000545	1.43733	0.116	0.036	0.0059	0.0205	0.0044	0.056	0.0151	121.9	1759	550	0.566	0.919	209.9	12362.9	0.000459393	0.000123872
Y724-06	μg g-1	332.3	9690	791	1308	0.009	0.088	0.0116	0.0275	0.0072	0.0005	1.383	0.114	0.0077	0.00108	0.0079	0.0028	0.035	0.0061	102.7	513	588	3.01	0.264	224.3	12404.7	0.000340798	5.93963e-05
Y724-07	μg g-1	269.5	4270	661	4170	0.015	0.133	0.021	0.0335	0.0099	0.0002	1.45933	0.12	0.0137	0.0054	0.0218	0.0067	0.058	0.0171	87.2	1260	7890	1.31	0.464	182	10448.2	0.000665138	0.000196101
Y724-08	μg g-1	315.5	7420	886	3450	0.0074	0.096	0.017	0.0415	0.0152	0.00085	1.45167	0.122	0.0092	0.00164	0.0123	0.0022	0.041	0.0134	124.5	786	11910	0.292	0.128	303	12666.5	0.000329317	0.000107631
Y724-09	μg g-1	209.7	9310	805	5100	0.006	0.106	0.0104	0.037	0.0099	0.0002	1.51433	0.126	0.027	0.0037	0.0139	0.0059	0.118	0.0241	125	2270	603	0.309	0.349	168.1	17610	0.000944	0.0001928
Y724-10	μg g-1	363.6	10590	1086	4750	0.0067115	0.0169	0.0034	0.00449365	0.0033	0.00043	1.48367	0.128	0.0028	0.00122	0.0044	0.0033	0.068	0.0138	149.8	408	12890	0.039	0.0134	425	16983.8	0.000453939	9.21228e-05
Y724-11	μg g-1	336.4	8390	842	2520	0.00566302	0.0284	0.005	0.00515	0.0028	0.00081	1.276	0.1025	0.0027	0.00102	0.0037	0.00169	0.0284	0.0078	106.3	325	7850	1.26	0.0903	269.8	12183.3	0.000267168	7.33772e-05
Y724-12	μg g-1	312.2	5909	735	1520	0.0039	0.0412	0.0032	0.0106	0.004	0.001235	1.27133	0.1119	0.0113	0.00212	0.0065	0.0016	0.0186	0.008	102.7	710	3600	0.67	0.0828	215	8976.7	0.00018111	7.78968e-05
Y724-13	μg g-1	123.1	1119	303	4330	0.0062	0.0385	0.006	0.01495	0.0064	0.001395	1.314	0.1079	0.0049	0.00095	0.0047	0.0024	0.041	0.0078	32.1	710	13430	0.54	0.117	94.4	6494.1	0.00127726	0.000242991
Y724-14	μg g-1	320.4	6515	725	1014	0.0077	0.0463	0.0075	0.0235	0.0115	0.00104	1.34133	0.1212	0.0204	0.0036	0.0083	0.0034	0.0157	0.0084	96.9	1060	211.3	0.286	0.0152	154.7	9410.9	0.000162023	8.66873e-05
Y724-15	μg g-1	260.1	6730	791	2082	0.0096	0.0213	0.0048	0.01015	0.0026	0.001325	1.338	0.119	0.0084	0.00104	0.0034	0.00215	0.032	0.0088	112.4	457	11100	0.125	0.075	236.7	10172.4	0.000284698	7.82918e-05
Y724-16	μg g-1	65.1	3095	874	3540	0.0027	0.0344	0.0067	0.01785	0.008	0.00025	1.40733	0.1184	0.0036	0.00165	0.0091	0.0033	0.0286	0.0098	129.6	848	179	0.028	0.094	175	8486.6	0.000220679	7.56173e-05
