# Supplementary material for: In situ Hf isotope analysis of cassiterite by LA-MC-ICP-MS: protocol and applications
Source: Royal Society of Chemistry journal article supplement (doi:10.1039/d2ja00340f), 2022-12-20
Supplement: d2ja00340f2.xlsx [file d2ja00340f2.xlsx]

## Sheet: Hf data on 2021.03.01
Sample	178Hf (V) a	176Yb/177Hf	2SE	176Lu/177Hf	2SE	176Hf/177Hf	2SE	εHf(t)	2SE
Rond-A-01	0.24142	0.00170968	3.50929e-05	9.09196e-05	1.75312e-06	0.28222	6.83736e-05	2.54323	2.58267
Rond-A-02	0.2367	0.00154207	3.53736e-05	8.27874e-05	1.74933e-06	0.282121	7.87805e-05	-0.965739	2.93151
Rond-A-03	0.150233	0.0025249	5.31793e-05	0.000130345	3.04269e-06	0.282209	0.000103621	2.12727	3.77937
Rond-A-04	0.152892	0.00250301	6.6544e-05	0.000131319	2.83699e-06	0.282183	0.000105979	1.22782	3.86061
Rond-A-05	0.251765	0.00379557	3.52949e-05	0.000192247	1.79844e-06	0.282041	7.93527e-05	-3.84703	2.94986
Rond-A-06	0.261198	0.00387329	4.69116e-05	0.000191535	2.07007e-06	0.282142	6.657e-05	-0.293853	2.52174
Rond-A-07	0.257408	0.00285391	3.30504e-05	0.000146126	1.68537e-06	0.282189	6.96025e-05	1.40175	2.62304
Rond-A-08	0.259242	0.00307172	3.35086e-05	0.000155747	1.63746e-06	0.282219	6.64201e-05	2.45887	2.5172
Rond-A-09	0.231027	0.00271418	3.36754e-05	0.000139079	1.61076e-06	0.282131	7.38888e-05	-0.653464	2.7664
Rond-A-10	0.262528	0.00288184	3.24457e-05	0.000146263	1.66228e-06	0.282159	6.73294e-05	0.354671	2.54738
Rond-A-11	0.264933	0.00272509	2.99102e-05	0.000139445	1.70613e-06	0.282207	6.86022e-05	2.05582	2.58981
Rond-A-12	0.270611	0.0032914	4.30708e-05	0.000137226	1.65421e-06	0.282155	7.3435e-05	0.198807	2.75122
Rond-A-13	0.265327	0.002838	3.1566e-05	0.0001453	1.65729e-06	0.28219	7.04653e-05	1.45102	2.65183
Rond-A-14	0.168304	0.00259743	5.25915e-05	0.000129571	2.64858e-06	0.282115	0.000104653	-1.21367	3.81485
Rond-A-15	0.16362	0.00301626	6.30617e-05	0.000142428	2.86058e-06	0.282207	0.0001047	2.06824	3.81648
Rond-A-16	0.174508	0.00287527	4.71094e-05	0.000138541	2.36968e-06	0.282251	0.000103226	3.63016	3.76576
Rond-A-17	0.267045	0.00276024	3.03617e-05	0.000138466	1.53982e-06	0.282146	6.58971e-05	-0.110958	2.49995
Rond-A-18	0.302706	0.00329497	2.59808e-05	0.000165994	1.41395e-06	0.282182	5.86701e-05	1.16351	2.26225
Rond-A-19	0.271639	0.0032035	3.17271e-05	0.000162158	1.50951e-06	0.282166	6.64948e-05	0.592354	2.51955
Rond-A-20	0.289542	0.00331968	2.92051e-05	0.000168066	1.47095e-06	0.282194	5.58402e-05	1.59068	2.17041
Rond-A-21	0.284265	0.00311256	3.24949e-05	0.000159704	1.61253e-06	0.282181	7.1771e-05	1.11201	2.69532
Rond-A-22	0.302264	0.00356553	2.73583e-05	0.000179698	1.39764e-06	0.282195	5.92124e-05	1.61533	2.2798
Rond-A-23	0.269856	0.00322744	2.96987e-05	0.00016545	1.75591e-06	0.282189	6.18541e-05	1.41041	2.36641
Rond-A-24	0.287562	0.00261402	3.05089e-05	0.000133785	1.47212e-06	0.282147	6.39086e-05	-0.0760908	2.43429
Rond-A-25	0.283466	0.00270592	3.22993e-05	0.000139616	1.51853e-06	0.282231	6.5679e-05	2.89326	2.49282
Rond-A-26	0.142207	0.00287748	5.95795e-05	0.000144892	2.81748e-06	0.282195	0.000101949	1.63508	3.72171
Rond-A-27	0.15735	0.00243939	5.28594e-05	0.000123062	2.71479e-06	0.282195	0.000100623	1.65891	3.67625
Rond-A-28	0.280456	0.00279954	3.11194e-05	0.000141969	1.54503e-06	0.282196	7.44399e-05	1.65498	2.78494
Rond-A-29	0.272776	0.00311686	3.13837e-05	0.000159597	1.50724e-06	0.282151	6.60256e-05	0.0456747	2.50401
Rond-A-30	0.279606	0.00272734	3.11651e-05	0.000140402	1.57994e-06	0.282114	6.61382e-05	-1.22529	2.50788
RG-114-01	0.116484	0.000391637	7.24778e-05	2.13753e-05	3.57267e-06	0.282112	0.000135862	-0.780436	4.89799
RG-114-02	0.110208	0.000449618	8.11127e-05	2.12686e-05	3.75029e-06	0.281976	0.000150885	-5.59357	5.4223
RG-114-03	0.185045	0.000388135	5.89972e-05	1.70748e-05	2.23434e-06	0.281856	8.72299e-05	-9.83781	3.21855
RG-114-04	0.221798	0.00022833	3.93056e-05	1.23659e-05	1.96667e-06	0.281836	8.09627e-05	-10.5746	3.00581
RG-114-05	0.145741	0.000329833	6.20061e-05	1.76886e-05	3.30642e-06	0.281889	0.000113586	-8.68448	4.12411
RG-114-06	0.172835	0.000309365	4.84673e-05	1.64449e-05	2.34341e-06	0.281833	9.1345e-05	-10.6767	3.35889
RG-114-07	0.127745	0.000408602	6.25195e-05	2.26209e-05	3.50537e-06	0.281922	0.000128368	-7.52736	4.63696
RG-114-08	0.155405	0.000355703	5.41465e-05	1.76704e-05	2.48327e-06	0.281807	0.000114392	-11.5858	4.15198
RG-114-09	0.176115	0.000298804	5.20253e-05	1.67355e-05	2.45149e-06	0.281851	9.1673e-05	-10.0281	3.37011
RG-114-10	0.14507	0.000393299	5.51096e-05	1.85075e-05	2.64115e-06	0.281723	0.000112976	-14.5537	4.10291
RG-114-11	0.165292	0.000356436	4.98154e-05	1.96247e-05	2.70413e-06	0.281931	0.000105901	-7.20302	3.85868
RG-114-12	0.152029	0.00280455	0.000337266	6.61221e-05	6.66053e-06	0.281959	0.00011064	-6.22227	4.02202
RG-114-13	0.204455	0.000227383	4.29516e-05	1.35768e-05	2.15177e-06	0.281863	8.89053e-05	-9.60081	3.27567
RG-114-14	0.217108	0.000234528	4.08805e-05	1.53788e-05	2.00637e-06	0.281906	8.50564e-05	-8.09801	3.14467
RG-114-15	0.253197	0.000198889	3.20379e-05	1.13096e-05	1.96166e-06	0.281878	7.18162e-05	-9.06473	2.69808
RG-114-16	0.267073	0.000154173	2.97751e-05	1.00207e-05	1.57565e-06	0.281813	6.56706e-05	-11.3655	2.49356
RG-114-17	0.243308	0.000207208	3.21604e-05	1.11236e-05	1.69118e-06	0.281841	7.56345e-05	-10.399	2.82609
RG-114-18	0.279478	0.00130991	0.000207938	3.79678e-05	6.92899e-06	0.281864	6.77424e-05	-9.57358	2.56204
RG-114-19	0.278311	0.000450917	4.26476e-05	1.63428e-05	1.55237e-06	0.281839	6.57369e-05	-10.4704	2.49573
RG-114-20	0.267822	0.00017462	3.0598e-05	1.07945e-05	1.55652e-06	0.281833	6.23565e-05	-10.6605	2.38431
RG-114-21	0.199884	0.00022863	4.21478e-05	1.5199e-05	2.18668e-06	0.281945	8.70862e-05	-6.71283	3.21375
RG-114-22	0.339603	0.00013476	2.48451e-05	9.26218e-06	1.13828e-06	0.281857	5.7521e-05	-9.81242	2.22641
RG-114-23	0.285011	0.000169505	2.88478e-05	1.10493e-05	1.65224e-06	0.281871	6.28913e-05	-9.31329	2.40193
RG-114-24	0.259503	0.000170902	3.31473e-05	1.23846e-05	1.56233e-06	0.281822	6.83846e-05	-11.0621	2.58358
RG-114-25	0.323548	0.000157438	2.65519e-05	9.5517e-06	1.32173e-06	0.281864	6.03931e-05	-9.57749	2.31999
RG-114-26	0.333997	0.000381578	2.57381e-05	1.57098e-05	1.4092e-06	0.281878	5.68916e-05	-9.08098	2.20595
RG-114-27	0.263686	0.000173824	3.10384e-05	1.15525e-05	1.577e-06	0.281827	7.50296e-05	-10.863	2.80574
RG-114-28	0.277188	0.000655711	0.000100598	1.85725e-05	2.26988e-06	0.281827	7.52182e-05	-10.8854	2.81202
RG-114-29	0.214397	0.000299222	4.03044e-05	1.50231e-05	1.90216e-06	0.281954	8.31609e-05	-6.36628	3.08037
RG-114-30	0.226047	0.0079628	0.0005801	0.000102825	7.04152e-06	0.281938	7.91418e-05	-7.01792	2.94362
Kard-01	0.245847	0.000225825	3.67997e-05	1.03834e-05	1.64561e-06	0.282404	7.02408e-05	-3.77435	2.51132
Kard-02	0.251625	0.000262802	4.01524e-05	1.18758e-05	1.83864e-06	0.282452	6.88195e-05	-2.08389	2.46153
Kard-03	0.143303	0.000790791	7.7728e-05	3.16753e-05	3.36823e-06	0.282526	0.000120927	0.530798	4.29502
Kard-04	0.242058	0.00241171	0.000172227	7.00577e-05	5.68428e-06	0.282501	7.2059e-05	-0.376789	2.57498
Kard-05	0.20707	0.00273653	8.97621e-05	7.76612e-05	2.92854e-06	0.282516	7.69137e-05	0.158941	2.74529
Kard-06	0.252585	0.0041242	0.000133177	0.000108295	3.71748e-06	0.282424	7.2236e-05	-3.11176	2.58112
Kard-07	0.230006	0.000286178	3.66115e-05	1.3434e-05	1.82404e-06	0.282397	7.16986e-05	-4.04237	2.56241
Kard-08	0.249761	0.000250003	3.28709e-05	1.27282e-05	1.73244e-06	0.282462	7.04529e-05	-1.73431	2.51876
Kard-09	0.252136	0.00124546	7.96912e-05	3.75821e-05	2.68853e-06	0.282442	7.10689e-05	-2.43609	2.54031
Kard-10	0.233005	0.000488943	3.7971e-05	2.06077e-05	2.00552e-06	0.282523	8.00438e-05	0.414341	2.85528
Kard-11	0.29682	0.000498932	3.32844e-05	1.8457e-05	1.4442e-06	0.282452	6.49851e-05	-2.06467	2.32728
Kard-12	0.320608	0.000212125	2.86474e-05	1.24033e-05	1.30249e-06	0.282449	6.49812e-05	-2.17265	2.32715
Kard-13	0.363931	0.000204597	2.37332e-05	1.10548e-05	1.06967e-06	0.2824	5.07414e-05	-3.91494	1.83056
Kard-14	0.376765	0.000174126	2.34308e-05	9.59579e-06	1.15216e-06	0.282409	4.97095e-05	-3.61147	1.79474
Kard-15	0.252978	0.000300377	3.99021e-05	1.58223e-05	1.66616e-06	0.282413	7.61135e-05	-3.4708	2.71728
Kard-16	0.230927	0.00561631	7.75207e-05	0.000148677	2.38815e-06	0.282451	7.81373e-05	-2.15632	2.78815
Kard-17	0.212625	0.000296995	3.9407e-05	1.5527e-05	2.02692e-06	0.282447	7.92049e-05	-2.26273	2.82581
Kard-18	0.239219	0.000226506	3.55276e-05	1.34302e-05	1.80322e-06	0.282487	7.51304e-05	-0.84476	2.68279
Kard-19	0.325524	0.000466278	4.50863e-05	1.79989e-05	1.74234e-06	0.282453	5.65603e-05	-2.05517	2.03304
Kard-20	0.336278	0.000198281	2.41718e-05	1.17242e-05	1.34327e-06	0.282463	5.88157e-05	-1.69243	2.11171
Kard-21	0.217063	0.000289473	3.79071e-05	1.64394e-05	1.99514e-06	0.282433	8.88389e-05	-2.75296	3.16443
Kard-22	0.328358	0.00328123	0.000617915	9.90578e-05	1.79802e-05	0.282472	6.06488e-05	-1.4084	2.17557
Kard-23	0.293023	0.000954483	4.34553e-05	3.10472e-05	1.55736e-06	0.282452	7.13891e-05	-2.09738	2.55155
Kard-24	0.22906	0.00187893	0.000142647	5.53519e-05	3.93561e-06	0.282429	7.35178e-05	-2.90067	2.62615
Kard-25	0.249421	0.000231731	3.53859e-05	1.28619e-05	1.77752e-06	0.282449	7.07699e-05	-2.19569	2.52987
Kard-26	0.256813	0.000281119	3.37804e-05	1.50206e-05	1.79112e-06	0.282461	7.09445e-05	-1.75201	2.53599
Kard-27	0.28066	0.000433255	3.15016e-05	1.77637e-05	1.40297e-06	0.282446	6.25712e-05	-2.31053	2.24286
Kard-28	0.322194	0.000194579	2.93589e-05	1.15574e-05	1.32427e-06	0.28242	5.87801e-05	-3.22288	2.11046
Kard-29	0.253758	0.000205222	3.17881e-05	1.47033e-05	1.70589e-06	0.282443	7.01805e-05	-2.3826	2.50921
Kard-30	0.240518	0.000195233	3.35272e-05	1.43877e-05	1.71719e-06	0.282498	7.86747e-05	-0.465367	2.80721
BB#7-01	0.226939	0.000228045	2.61305e-05	8.76425e-06	1.43421e-06	0.282433	6.37165e-05	-6.28648	2.2653
BB#7-02	0.304045	0.000225277	3.01782e-05	9.74745e-06	1.42865e-06	0.282519	6.86115e-05	-3.23025	2.43775
BB#7-03	0.145001	0.000513572	5.53838e-05	1.73228e-05	2.71847e-06	0.282593	0.000117595	-0.614483	4.16686
BB#7-04	0.625807	9.79448e-05	1.32792e-05	5.18397e-06	6.86846e-07	0.282431	3.83121e-05	-6.34423	1.37342
BB#7-05	0.738166	8.77039e-05	1.07391e-05	3.68697e-06	5.94108e-07	0.282413	3.38942e-05	-6.9697	1.21937
BB#7-06	0.728019	9.70342e-05	1.15096e-05	4.27616e-06	6.16908e-07	0.282426	2.84299e-05	-6.51294	1.0298
BB#7-07	0.418904	0.000155188	2.24317e-05	6.76362e-06	9.96485e-07	0.282469	4.86827e-05	-5.00171	1.73663
BB#7-08	0.343551	0.000184196	2.75209e-05	7.08598e-06	1.18871e-06	0.282555	5.55515e-05	-1.95365	1.97796
BB#7-09	0.430058	0.000165289	2.04532e-05	5.88476e-06	9.84749e-07	0.282441	4.72344e-05	-5.98904	1.68581
BB#7-10	0.381552	0.000171502	2.07946e-05	7.36151e-06	1.24723e-06	0.28252	5.41757e-05	-3.20012	1.92959
BB#7-11	0.589198	0.00012228	1.45816e-05	5.26269e-06	7.91934e-07	0.282409	3.67265e-05	-7.13983	1.31807
BB#7-12	0.276591	0.000227329	3.0174e-05	8.47494e-06	1.50854e-06	0.282541	6.73461e-05	-2.44644	2.39316
BB#7-13	0.131194	0.000505536	6.68988e-05	1.94075e-05	3.29365e-06	0.28261	0.000127392	-0.0214836	4.51307
BB#7-14	0.491403	0.000136583	1.67031e-05	5.25788e-06	8.22255e-07	0.282465	3.36087e-05	-5.16383	1.20945
BB#7-15	0.447363	0.000130992	1.93763e-05	5.45692e-06	9.06591e-07	0.282434	4.22034e-05	-6.24547	1.50949
BB#7-16	0.668453	0.000102276	1.19932e-05	3.63934e-06	6.01586e-07	0.28241	3.33101e-05	-7.08959	1.19905
BB#7-17	0.19656	0.00030103	4.02742e-05	1.33919e-05	2.09773e-06	0.282582	9.29415e-05	-0.996996	3.29605
BB#7-18	0.686668	9.28308e-05	1.35548e-05	3.59052e-06	6.523e-07	0.282437	3.33595e-05	-6.15022	1.20078
BB#7-19	0.767326	8.82783e-05	1.20073e-05	3.50928e-06	5.78192e-07	0.282454	3.25598e-05	-5.52387	1.17297
BB#7-20	0.548311	0.000109753	1.55506e-05	4.5581e-06	8.19767e-07	0.28246	4.202e-05	-5.31005	1.50308
BB#7-21	0.989642	5.66883e-05	8.23617e-06	2.54943e-06	4.48323e-07	0.282411	2.78652e-05	-7.05008	1.01029
BB#7-22	1.11062	5.22803e-05	6.99621e-06	2.32584e-06	3.64572e-07	0.282439	2.39407e-05	-6.078	0.875291
BB#7-23	1.11921	5.76628e-05	6.75416e-06	2.10712e-06	3.55198e-07	0.282418	2.33008e-05	-6.81109	0.85339
BB#7-24	0.235947	0.000224973	3.19489e-05	1.12603e-05	1.64569e-06	0.282518	7.1625e-05	-3.2703	2.54396
BB#7-25	0.249309	0.000264257	3.65164e-05	8.51473e-06	1.62255e-06	0.282594	7.31676e-05	-0.571543	2.59835
BB#7-26	0.267364	0.000232676	3.26093e-05	9.03598e-06	1.61854e-06	0.282522	6.3658e-05	-3.13814	2.26324
BB#7-27	0.260072	0.000224923	3.08808e-05	9.97001e-06	1.77868e-06	0.282571	6.56513e-05	-1.38892	2.33345
BB#7-28	0.267777	0.000225179	2.95335e-05	1.01505e-05	1.44494e-06	0.282524	7.04914e-05	-3.07215	2.504
BB#7-29	0.27367	0.000202732	2.85162e-05	9.16784e-06	1.50136e-06	0.282534	6.46646e-05	-2.72153	2.2987
19MP-01	0.312382	0.00151999	2.47135e-05	6.61685e-05	1.4222e-06	0.282427	5.85719e-05	-8.70116	2.07625
19MP-02	0.179992	0.00284113	0.000344207	9.01726e-05	9.29374e-06	0.282385	0.00010581	-10.1798	3.74552
19MP-03	0.192135	0.00080909	4.45025e-05	3.7284e-05	2.24799e-06	0.282498	9.25485e-05	-6.17882	3.2767
19MP-04	0.201199	0.00112303	4.18916e-05	5.3251e-05	2.2533e-06	0.282528	8.63747e-05	-5.12839	3.05848
19MP-05	0.179712	0.00136008	4.77641e-05	6.44674e-05	2.30341e-06	0.282483	9.14467e-05	-6.71618	3.23775
19MP-06	0.176288	0.00188582	0.000114719	7.48707e-05	3.33197e-06	0.282499	0.000107626	-6.15602	3.80973
19MP-07	0.132949	0.00162543	6.33123e-05	7.2478e-05	3.26704e-06	0.282536	0.000119731	-4.8592	4.23773
19MP-08	0.243234	0.000996001	3.45831e-05	4.34766e-05	1.81854e-06	0.282526	7.26941e-05	-5.19109	2.57504
19MP-09	0.166887	0.00103108	5.48014e-05	4.5438e-05	2.68857e-06	0.282476	0.000103821	-6.96243	3.67519
19MP-10	0.192263	0.000789509	4.27548e-05	3.74315e-05	2.12573e-06	0.282438	8.43807e-05	-8.30686	2.98801
19MP-11	0.207219	0.000937616	4.2369e-05	4.36529e-05	2.1102e-06	0.282605	8.42601e-05	-2.39355	2.98375
19MP-12	0.167602	0.00186169	5.26872e-05	8.30029e-05	2.79493e-06	0.282407	0.000101333	-9.40906	3.58722
19MP-13	0.190029	0.00127436	5.13856e-05	5.18263e-05	2.1513e-06	0.282501	9.26258e-05	-6.07577	3.27943
19MP-14	0.198085	0.00132619	4.98811e-05	5.89226e-05	2.80062e-06	0.282476	8.89107e-05	-6.97499	3.14811
19MP-15	0.258986	0.00056155	3.15723e-05	2.70038e-05	1.70023e-06	0.28239	7.22355e-05	-9.99051	2.55884
19MP-16	0.129237	0.000871514	6.61411e-05	3.95354e-05	3.04145e-06	0.28251	0.000115747	-5.7632	4.09687
19MP-17	0.215038	0.00149865	5.03503e-05	5.5953e-05	2.25937e-06	0.282374	8.72153e-05	-10.5601	3.08819
19MP-18	0.103524	0.00105808	8.27129e-05	5.11064e-05	3.99528e-06	0.282628	0.000154177	-1.59478	5.45586
19MP-19	0.225962	0.00107685	3.90352e-05	5.21526e-05	1.68345e-06	0.282418	8.34689e-05	-9.01499	2.95578
19MP-20	0.153976	0.00107246	5.83611e-05	5.06086e-05	2.7977e-06	0.282418	0.000108221	-9.02642	3.83075
19MP-21	0.337127	0.000501011	2.78862e-05	2.7925e-05	1.35347e-06	0.282366	5.90477e-05	-10.8608	2.09305
19MP-22	0.405115	0.000609961	2.15737e-05	2.71275e-05	1.06055e-06	0.282401	4.86064e-05	-9.60782	1.72457
19MP-23	0.342097	0.000507302	2.55927e-05	2.65999e-05	1.15489e-06	0.282355	5.84068e-05	-11.2498	2.07043
19MP-24	0.23598	0.000635127	3.23845e-05	3.02921e-05	1.57548e-06	0.282454	8.0245e-05	-7.74456	2.84185
19MP-25	0.167795	0.000923887	5.17824e-05	4.34685e-05	2.67561e-06	0.28256	0.000100487	-3.98586	3.55733
19MP-26	0.134977	0.00102487	8.16548e-05	5.13143e-05	4.08427e-06	0.282586	0.000143156	-3.08102	5.06608
19MP-27	0.101253	0.00159156	0.000105982	7.93893e-05	4.70439e-06	0.282628	0.000171667	-1.60199	6.07443
19MP-28	0.263669	0.00101666	3.05205e-05	4.60418e-05	1.56903e-06	0.28242	7.47316e-05	-8.95461	2.64703
19MP-29	0.185906	0.000857855	4.60328e-05	4.04835e-05	2.3406e-06	0.282443	8.82404e-05	-8.1126	3.12442
19MP-30	0.309357	0.000693225	2.76979e-05	3.26987e-05	1.44183e-06	0.282426	6.22409e-05	-8.72092	2.20581
19GX-01	0.293956	0.00030194	2.5982e-05	1.16703e-05	1.3487e-06	0.282485	6.16361e-05	-7.96564	2.18195
19GX-02	0.285015	0.000305625	2.86716e-05	1.416e-05	1.45661e-06	0.282447	5.90876e-05	-9.30058	2.09188
19GX-03	0.111568	0.000741519	7.06029e-05	3.06957e-05	3.68691e-06	0.282599	0.00014955	-3.93201	5.2906
19GX-04	0.195072	0.000329866	4.31281e-05	1.17613e-05	2.17616e-06	0.282547	8.69668e-05	-5.76753	3.07744
19GX-05	0.196329	0.000344168	4.47458e-05	1.57727e-05	2.1064e-06	0.282573	8.98898e-05	-4.84846	3.18079
19GX-06	0.190859	0.000387627	4.63233e-05	1.54933e-05	2.13622e-06	0.282589	9.20383e-05	-4.26457	3.25676
19GX-07	0.181448	0.000403126	4.35129e-05	1.67932e-05	2.46653e-06	0.282625	8.92462e-05	-2.99389	3.15803
19GX-08	0.146005	0.000482252	5.64923e-05	1.88429e-05	2.79963e-06	0.28263	0.000111995	-2.82337	3.96244
19GX-09	0.216366	0.000332383	4.1552e-05	1.28014e-05	1.79443e-06	0.282591	8.27722e-05	-4.19747	2.92913
19GX-10	0.155316	0.000476846	5.11318e-05	1.9737e-05	2.55331e-06	0.282595	0.000114169	-4.06617	4.03934
19GX-11	0.232225	0.00034139	3.49783e-05	1.39295e-05	1.80062e-06	0.28252	7.67851e-05	-6.71046	2.71746
19GX-12	0.150038	0.000504824	5.91049e-05	2.19014e-05	2.85396e-06	0.282602	0.000127657	-3.82855	4.51632
19GX-13	0.106772	0.000716338	8.22619e-05	2.74503e-05	3.7905e-06	0.282733	0.000148418	0.806014	5.25058
19GX-14	0.18468	0.000435957	4.99657e-05	1.85912e-05	2.22225e-06	0.282609	9.95037e-05	-3.58541	3.52073
19GX-15	0.172232	0.000387114	4.94643e-05	1.89322e-05	2.4744e-06	0.282599	9.8752e-05	-3.93827	3.49415
19GX-16	0.246006	0.000279853	3.63058e-05	1.15817e-05	1.88019e-06	0.282514	7.73185e-05	-6.92106	2.73631
19GX-17	0.202728	0.00036648	4.01337e-05	1.50434e-05	2.1497e-06	0.282457	8.68898e-05	-8.93116	3.07471
19GX-18	0.268895	0.00025576	3.56664e-05	1.09568e-05	1.52523e-06	0.282528	7.01834e-05	-6.44581	2.48408
19GX-19	0.234167	0.000294769	3.77443e-05	1.47296e-05	1.71343e-06	0.282582	8.28418e-05	-4.53673	2.93159
19GX-20	0.240769	0.000324356	3.54786e-05	1.19728e-05	1.71521e-06	0.282552	7.42866e-05	-5.60134	2.62913
19GX-21	0.271973	0.00026792	3.06867e-05	1.17621e-05	1.6781e-06	0.282509	6.51514e-05	-7.11148	2.3062
19GX-22	0.262506	0.000259932	3.21677e-05	1.3031e-05	1.69143e-06	0.282558	7.62323e-05	-5.36308	2.69791
19GX-23	0.125389	0.000641634	6.82576e-05	3.00208e-05	3.28507e-06	0.282568	0.000148182	-5.02151	5.24221
19GX-24	0.153779	0.000505708	5.22639e-05	2.09288e-05	2.78289e-06	0.282411	0.000103726	-10.5785	3.67003
19GX-25	0.165794	0.000465823	4.63194e-05	2.02459e-05	2.65759e-06	0.282552	0.000109408	-5.60037	3.87098
19GX-26	0.160135	0.00039349	5.32295e-05	1.83629e-05	2.46364e-06	0.28256	0.000106917	-5.31763	3.78288
19GX-27	0.19419	0.000421573	4.85292e-05	1.8675e-05	2.08377e-06	0.282496	9.66503e-05	-7.5673	3.41983
19GX-28	0.175866	0.000423788	4.55203e-05	1.9423e-05	2.28604e-06	0.282638	0.000105027	-2.53003	3.71606
19GX-29	0.127487	0.000557411	6.1906e-05	2.68257e-05	3.4805e-06	0.28262	0.000119434	-3.1951	4.22554
Y724-01	0.262393	0.00169631	3.31303e-05	7.43646e-05	1.54566e-06	0.282757	7.0688e-05	1.17668	2.50112
Y724-02	0.222973	0.000846756	4.4475e-05	3.46137e-05	2.19996e-06	0.282914	8.10585e-05	6.71561	2.86781
Y724-03	0.273737	0.000906442	3.24829e-05	3.72818e-05	1.74308e-06	0.282766	6.70821e-05	1.51034	2.37362
Y724-04	0.155934	0.0072123	0.000299927	0.000205481	7.72856e-06	0.282557	0.00012202	-5.90389	4.31639
Y724-05	0.151025	0.0200551	0.00307061	0.000564615	8.3916e-05	0.282771	0.000106032	1.65659	3.75092
Y724-06	0.197637	0.00136934	0.000199916	5.05188e-05	6.05754e-06	0.282903	9.70175e-05	6.32614	3.43216
Y724-07	0.160137	0.000973904	5.14153e-05	4.15374e-05	2.92787e-06	0.282732	0.000110259	0.308161	3.90046
Y724-08	0.170062	0.00068665	4.37148e-05	2.9579e-05	2.42756e-06	0.282889	0.00010185	5.85044	3.60308
Y724-09	0.189236	0.00068402	4.28296e-05	2.85838e-05	2.15232e-06	0.282712	8.97177e-05	-0.416616	3.17402
Y724-10	0.163522	0.00093435	4.83853e-05	3.5624e-05	2.81775e-06	0.282673	9.71081e-05	-1.78187	3.43537
Y724-11	0.236398	0.00137605	0.00012504	5.09079e-05	1.01582e-05	0.282651	8.49116e-05	-2.5612	3.00406
Y724-12	0.244067	0.000678346	3.93471e-05	2.87606e-05	1.65533e-06	0.282714	7.85305e-05	-0.347551	2.77842
Y724-13	0.236741	0.00221679	0.000328555	6.74877e-05	9.15774e-06	0.282767	7.69997e-05	1.51828	2.72429
Y724-14	0.200234	0.00202079	0.000137177	6.38168e-05	3.43446e-06	0.282759	8.25942e-05	1.24264	2.92212
Y724-15	0.184204	0.0120818	0.000341474	0.0004331	1.12056e-05	0.28276	8.57933e-05	1.26607	3.03522
Y724-16	0.214709	0.000867897	3.88264e-05	3.60352e-05	1.96069e-06	0.282778	7.68342e-05	1.91358	2.71844
Y724-17	0.220453	0.00172954	0.000104241	5.57148e-05	3.29203e-06	0.282731	8.10439e-05	0.273494	2.8673
Y724-18	0.195208	0.000953358	4.70162e-05	4.0124e-05	2.24148e-06	0.282696	9.75879e-05	-0.979632	3.45233
Y724-19	0.212868	0.0053518	0.000357127	0.000149145	9.30371e-06	0.282792	8.18714e-05	2.4055	2.89655
Y724-20	0.201127	0.00192433	0.000131755	6.55891e-05	4.0929e-06	0.282763	8.52601e-05	1.40572	3.01639
Y724-21	0.187682	0.00111527	5.49679e-05	4.28401e-05	2.13364e-06	0.282796	9.30639e-05	2.57211	3.29235
Y724-22	0.194614	0.00570889	0.00041644	0.000178993	1.35361e-05	0.282745	9.06834e-05	0.73874	3.20816
Y724-23	0.208615	0.000936442	5.00035e-05	3.45259e-05	2.07335e-06	0.282815	8.73025e-05	3.23767	3.08861
Y724-24	0.155612	0.0116059	0.000856647	0.000320927	2.2585e-05	0.282956	0.000113467	8.21874	4.0139
Y724-25	0.137961	0.00229238	6.49483e-05	0.000100647	3.20247e-06	0.282852	0.00012221	4.54433	4.3231
Y724-26	0.212726	0.000811296	3.90806e-05	3.33476e-05	2.19728e-06	0.282739	8.2757e-05	0.543287	2.92787
Y724-27	0.111215	0.00137771	7.42606e-05	6.04979e-05	3.77051e-06	0.28295	0.000155211	8.00456	5.49024
Y724-28	0.168924	0.00127856	5.55009e-05	5.72572e-05	2.83399e-06	0.28286	0.000104844	4.81247	3.70892
Y724-29	0.204212	0.000733019	4.3132e-05	3.0146e-05	2.19328e-06	0.282744	9.09609e-05	0.71593	3.21798
Y724-30	0.198727	0.0013738	4.29043e-05	5.47294e-05	2.03429e-06	0.282843	8.42546e-05	4.2219	2.98083
Note:
a. “V” represents the signal intensity. The reading of 1 V corresponds to ~ 9.0 * 105 cps.

## Sheet: Hf data on 2021.03.07
Sample	178Hf (V) a	176Yb/177Hf	2SE	176Lu/177Hf	2SE	176Hf/177Hf	2SE	εHf(t)	2SE
Rond-A-01	0.476213	0.00335866	1.8579e-05	0.000159455	9.08266e-07	0.282141	4.26273e-05	-0.279603	1.75398
Rond-A-02	0.452175	0.0015597	2.0589e-05	7.70221e-05	1.08913e-06	0.282132	4.8333e-05	-0.55621	1.93192
Rond-A-03	0.445703	0.00341283	1.98647e-05	0.000160851	9.3086e-07	0.282129	4.43103e-05	-0.720289	1.80558
Rond-A-04	0.43513	0.00334529	1.85814e-05	0.000158205	9.5028e-07	0.282191	4.2906e-05	1.46378	1.76259
Rond-A-05	0.411478	0.00292396	2.34316e-05	0.000139545	1.10965e-06	0.282191	4.95323e-05	1.48963	1.96903
Rond-A-06	0.474256	0.00316135	2.08636e-05	0.000150779	8.73899e-07	0.282214	4.54445e-05	2.31024	1.84091
Rond-A-07	0.442472	0.00254395	2.58591e-05	0.000120092	1.15456e-06	0.282209	4.75022e-05	2.12441	1.90543
Rond-A-08	0.455209	0.00271541	2.05996e-05	0.000130935	1.13365e-06	0.282186	4.25636e-05	1.30489	1.7525
Rond-A-09	0.444081	0.00204932	2.24785e-05	9.87614e-05	1.08469e-06	0.28216	4.66271e-05	0.435143	1.87828
Rond-A-10	0.497505	0.0033405	1.76145e-05	0.000159444	9.38648e-07	0.282173	4.14415e-05	0.825708	1.71796
Rond-A-11	0.468487	0.00310106	1.69797e-05	0.000148839	8.71557e-07	0.282173	4.68318e-05	0.836604	1.88405
Rond-A-12	0.458569	0.00287714	1.83917e-05	0.000138642	9.06293e-07	0.282123	4.7487e-05	-0.935465	1.90459
Rond-A-13	0.457213	0.00297018	1.82209e-05	0.000141327	9.21397e-07	0.282155	4.2065e-05	0.209614	1.73712
Rond-A-14	0.453555	0.0031372	2.04993e-05	0.000149766	1.00003e-06	0.282144	4.75216e-05	-0.190908	1.90556
Rond-A-15	0.513876	0.00375312	1.66713e-05	0.000178932	8.53459e-07	0.282157	4.21458e-05	0.275765	1.73906
Rond-A-16	0.513538	0.00363997	1.65222e-05	0.000173653	8.35452e-07	0.282219	4.02231e-05	2.47129	1.68107
Rond-A-17	0.483434	0.00293112	1.69478e-05	0.000139866	8.96864e-07	0.282186	4.67905e-05	1.3231	1.88289
Rond-A-18	0.47922	0.00330663	1.78868e-05	0.00015776	9.4918e-07	0.282161	4.56682e-05	0.407881	1.84768
Rond-A-19	0.442386	0.0030262	1.98296e-05	0.000144404	1.01525e-06	0.282196	4.42895e-05	1.68088	1.80526
Rond-A-20	0.473626	0.0028981	1.78951e-05	0.000138408	9.21135e-07	0.282187	4.72103e-05	1.33132	1.89603
Rond-A-21	0.490995	0.00346443	1.84128e-05	0.000164194	8.80378e-07	0.282138	4.34089e-05	-0.389381	1.77783
Rond-A-22	0.475949	0.00311313	1.80861e-05	0.000148553	8.61337e-07	0.282172	4.28934e-05	0.801184	1.76231
Rond-A-23	0.493636	0.00312085	1.70127e-05	0.000148643	8.91521e-07	0.282208	4.45586e-05	2.09861	1.81352
Rond-A-24	0.491097	0.00299894	1.77901e-05	0.000142633	9.0076e-07	0.28221	4.14168e-05	2.16195	1.71751
Rond-A-25	0.502766	0.00397443	1.77737e-05	0.000188594	9.0866e-07	0.282246	4.0804e-05	3.3992	1.69839
Rond-A-26	0.464537	0.00235633	1.97255e-05	0.00011357	9.62508e-07	0.282144	4.39818e-05	-0.142963	1.79612
Rond-A-27	0.280358	0.00248933	3.32791e-05	0.000116216	1.55515e-06	0.282236	6.75395e-05	3.08649	2.55473
Rond-A-28	0.483342	0.00294807	1.72512e-05	0.000140769	9.6044e-07	0.282119	4.17801e-05	-1.07252	1.72841
Rond-A-29	0.478411	0.00316868	1.86057e-05	0.000150644	8.26971e-07	0.282146	4.3899e-05	-0.106099	1.79308
RG-114-01	0.196414	0.000310379	4.67947e-05	1.16398e-05	2.16146e-06	0.282097	9.68811e-05	-1.29981	3.54866
RG-114-02	0.188635	0.000321641	4.41389e-05	1.5536e-05	2.31448e-06	0.281914	9.18324e-05	-7.8138	3.37562
RG-114-03	0.185139	0.000345865	4.72943e-05	1.43682e-05	2.60759e-06	0.282024	9.36848e-05	-3.88472	3.43907
RG-114-04	0.224127	0.000300349	3.64384e-05	1.24085e-05	1.73451e-06	0.282017	7.57554e-05	-4.13192	2.83032
RG-114-05	0.221776	0.000281711	3.99682e-05	1.18801e-05	1.96367e-06	0.282074	8.84812e-05	-2.12432	3.2614
RG-114-06	0.18331	0.000392022	4.99087e-05	1.59564e-05	2.52047e-06	0.282133	8.87033e-05	-0.0395948	3.26899
RG-114-07	0.177417	0.000368925	4.92924e-05	1.78039e-05	2.53144e-06	0.28217	9.74281e-05	1.28814	3.56744
RG-114-08	0.211606	0.000313815	4.18846e-05	1.30553e-05	2.03244e-06	0.282066	8.55083e-05	-2.41735	3.16019
RG-114-09	0.196662	0.000348771	4.81192e-05	1.70596e-05	2.18932e-06	0.282098	8.75441e-05	-1.2927	3.22946
RG-114-10	0.274216	0.000261065	2.89654e-05	1.0895e-05	1.58893e-06	0.282012	6.70554e-05	-4.31716	2.53966
RG-114-11	0.289054	0.000238193	2.70294e-05	1.11243e-05	1.48865e-06	0.282012	5.99699e-05	-4.33647	2.30633
RG-114-12	0.287121	0.000226788	2.87591e-05	1.05967e-05	1.49348e-06	0.282029	5.93117e-05	-3.72977	2.28487
RG-114-13	0.325248	0.000224186	2.5855e-05	1.02603e-05	1.33157e-06	0.281935	5.89317e-05	-7.05558	2.27237
RG-114-14	0.359657	0.000195295	2.82112e-05	9.46681e-06	1.27788e-06	0.281961	5.38378e-05	-6.1331	2.10765
RG-114-15	0.227765	0.000333346	4.46352e-05	1.42318e-05	2.01277e-06	0.282057	7.53013e-05	-2.72888	2.81508
RG-114-16	0.426191	0.000196263	2.05529e-05	8.13565e-06	9.65135e-07	0.281896	4.91842e-05	-8.43791	1.95949
RG-114-17	0.404956	0.000159662	2.10113e-05	7.0765e-06	1.02001e-06	0.281854	5.18367e-05	-9.90213	2.04354
RG-114-18	0.455575	0.000155421	2.23242e-05	6.60039e-06	9.89213e-07	0.281931	4.70494e-05	-7.18635	1.89256
RG-114-19	0.488997	0.00496245	0.000370109	0.000143167	1.09582e-05	0.281873	4.29355e-05	-9.35069	1.76347
RG-114-20	0.475782	0.000356618	2.67043e-05	1.20471e-05	1.01826e-06	0.281953	3.85564e-05	-6.42248	1.63348
RG-114-21	0.442936	0.000156734	1.86238e-05	7.22756e-06	8.61497e-07	0.281977	4.49506e-05	-5.55014	1.82741
RG-114-22	0.419998	0.000379634	2.2802e-05	1.42598e-05	1.11588e-06	0.281954	4.92656e-05	-6.38459	1.96206
RG-114-23	0.339549	0.000379866	2.73833e-05	1.28375e-05	1.35705e-06	0.281976	5.77074e-05	-5.5935	2.23257
RG-114-24	0.509069	0.000146098	1.79137e-05	6.95509e-06	7.77598e-07	0.281913	4.17233e-05	-7.82339	1.72849
RG-114-25	0.52115	0.000123962	1.76914e-05	7.03861e-06	7.55693e-07	0.28198	4.6785e-05	-5.45696	1.88437
RG-114-26	0.423191	0.000231027	2.03347e-05	1.04276e-05	1.03015e-06	0.281955	4.42796e-05	-6.32896	1.80664
RG-114-27	0.52789	0.000124471	1.43125e-05	6.39339e-06	7.60696e-07	0.281949	3.50568e-05	-6.54549	1.53129
RG-114-28	0.545611	0.000164703	1.66238e-05	6.85681e-06	7.8984e-07	0.281899	4.03307e-05	-8.30981	1.68643
RG-114-29	0.550929	0.000126345	1.51776e-05	5.98581e-06	7.52135e-07	0.281885	4.1291e-05	-8.8119	1.71536
RG-114-30	0.559809	0.000125074	1.4414e-05	5.78263e-06	7.20303e-07	0.281919	3.54297e-05	-7.62359	1.54199
Kard-01	0.348838	0.000745951	9.59875e-05	2.17365e-05	2.64399e-06	0.282489	5.32083e-05	-0.762897	1.91631
Kard-02	0.374395	0.000156489	2.32865e-05	7.04189e-06	1.15741e-06	0.282482	5.25351e-05	-1.01948	1.89292
Kard-03	0.37866	0.000318603	3.00478e-05	1.13858e-05	1.22976e-06	0.282469	5.19348e-05	-1.48117	1.87204
Kard-04	0.373943	0.000972632	5.99208e-05	2.69323e-05	1.8366e-06	0.282478	5.13063e-05	-1.17429	1.85017
Kard-05	0.388615	0.000186162	2.15122e-05	7.36809e-06	1.17396e-06	0.282474	4.71692e-05	-1.3069	1.70669
Kard-06	0.307853	0.001579	0.000214461	4.29026e-05	5.60179e-06	0.282465	6.10863e-05	-1.6249	2.19094
Kard-07	0.495599	0.000174242	1.66779e-05	7.34501e-06	9.11832e-07	0.282466	4.2215e-05	-1.56732	1.53557
Kard-08	0.505003	0.000174193	1.76703e-05	7.45161e-06	9.05713e-07	0.282441	3.77809e-05	-2.45283	1.38329
Kard-09	0.555164	0.000263401	1.61508e-05	8.68955e-06	7.54555e-07	0.282461	3.95874e-05	-1.76863	1.44521
Kard-10	0.335936	0.000279805	2.33103e-05	1.11268e-05	1.23236e-06	0.282456	5.45575e-05	-1.9197	1.96328
Kard-11	0.284469	0.000288481	2.96304e-05	1.13715e-05	1.53788e-06	0.282536	6.61145e-05	0.900254	2.36683
Kard-12	0.408233	0.000321754	2.8271e-05	1.18578e-05	1.01471e-06	0.282438	4.68829e-05	-2.56955	1.69676
Kard-13	0.540085	0.000151385	1.73646e-05	6.50672e-06	7.56232e-07	0.282414	3.54606e-05	-3.4395	1.30406
Kard-14	0.266839	0.00032164	3.56917e-05	1.34987e-05	1.63816e-06	0.282544	7.30896e-05	1.1783	2.61121
Kard-15	0.371253	0.00131556	2.7367e-05	3.64549e-05	1.16587e-06	0.282465	5.41064e-05	-1.62907	1.94753
Kard-16	0.316484	0.00179499	7.32044e-05	4.84341e-05	2.19545e-06	0.282437	6.46219e-05	-2.62787	2.31452
Kard-17	0.283947	0.000208085	2.84838e-05	9.42208e-06	1.50098e-06	0.28251	6.14521e-05	-0.0177321	2.20378
Kard-18	0.428505	0.000159837	2.03278e-05	7.33557e-06	1.01277e-06	0.282435	4.62408e-05	-2.68086	1.67455
Kard-19	0.717595	9.57588e-05	1.21764e-05	4.63948e-06	6.25276e-07	0.282379	3.11011e-05	-4.64764	1.15628
Kard-20	0.32772	0.000235671	2.84914e-05	8.74395e-06	1.44513e-06	0.282458	6.20759e-05	-1.87606	2.22557
Kard-21	0.331127	0.000188318	2.61048e-05	9.83308e-06	1.42355e-06	0.282527	5.80558e-05	0.582038	2.08522
Kard-22	0.443506	0.000200338	2.27684e-05	8.44449e-06	9.50918e-07	0.282443	4.53462e-05	-2.39955	1.64361
Kard-23	0.280667	0.000215648	2.74118e-05	1.07317e-05	1.50913e-06	0.28256	6.62548e-05	1.72796	2.37175
Kard-24	0.312212	0.00030657	2.51969e-05	1.156e-05	1.44819e-06	0.282451	6.01262e-05	-2.12223	2.15746
Kard-25	0.506962	0.000141521	1.5911e-05	6.8235e-06	8.37422e-07	0.282398	4.13374e-05	-3.99365	1.50533
Kard-26	0.492593	0.000233722	1.9496e-05	9.61309e-06	9.05974e-07	0.282446	4.51216e-05	-2.3071	1.63585
Kard-27	0.531735	0.000129891	1.44892e-05	5.69283e-06	8.48905e-07	0.282428	4.04551e-05	-2.92087	1.47501
Kard-28	0.626955	0.000122287	1.37379e-05	5.06959e-06	7.04482e-07	0.282442	3.48023e-05	-2.42341	1.28166
Kard-29	0.299017	0.000224653	2.97287e-05	1.18432e-05	1.58015e-06	0.282522	6.09705e-05	0.39875	2.18696
Kard-30	0.431113	0.000176143	2.09527e-05	9.1228e-06	1.03073e-06	0.282448	4.81328e-05	-2.20587	1.74007
BB#7-01	1.71167	5.21146e-05	5.18976e-06	2.10006e-06	2.72036e-07	0.282404	1.84684e-05	-7.31061	0.689601
BB#7-02	1.72585	4.9765e-05	4.97785e-06	1.95887e-06	2.43517e-07	0.282404	1.74433e-05	-7.30157	0.655332
BB#7-03	1.70034	5.73459e-05	5.15483e-06	2.07505e-06	2.51529e-07	0.28239	1.72908e-05	-7.80358	0.650249
BB#7-04	1.73768	5.18792e-05	5.59806e-06	1.96134e-06	2.27104e-07	0.282434	1.88611e-05	-6.25679	0.702792
BB#7-05	1.73332	5.56621e-05	4.76094e-06	1.98028e-06	2.46317e-07	0.282424	1.68414e-05	-6.5852	0.635316
BB#7-06	1.73133	4.96801e-05	4.67835e-06	2.01252e-06	2.56711e-07	0.282406	1.84553e-05	-7.24634	0.689162
BB#7-07	1.72492	5.67079e-05	4.68981e-06	2.07978e-06	2.33504e-07	0.282396	1.69468e-05	-7.60057	0.638808
BB#7-08	1.71641	5.1981e-05	5.375e-06	2.00625e-06	2.31608e-07	0.282427	1.87473e-05	-6.47576	0.698965
BB#7-09	0.467981	0.000181708	1.99582e-05	7.46591e-06	8.44605e-07	0.282576	4.59129e-05	-1.2128	1.63947
BB#7-10	0.433903	0.000208306	1.9602e-05	7.70138e-06	9.73216e-07	0.28257	4.85745e-05	-1.43033	1.73284
BB#7-11	0.505226	0.000175377	1.50114e-05	6.91323e-06	7.546e-07	0.282577	4.0803e-05	-1.1808	1.4605
BB#7-12	0.507683	0.000185639	1.68759e-05	6.37255e-06	7.64096e-07	0.282517	4.04286e-05	-3.3224	1.4474
BB#7-13	1.4629	6.12154e-05	5.73088e-06	2.34578e-06	2.81003e-07	0.282419	1.86465e-05	-6.78066	0.695579
BB#7-14	0.435848	0.000199693	1.87783e-05	7.6295e-06	9.29867e-07	0.282511	4.416e-05	-3.52384	1.57802
BB#7-15	0.290868	0.000292114	2.8477e-05	1.03277e-05	1.4866e-06	0.282572	6.46258e-05	-1.37383	2.29733
BB#7-16	0.366626	0.000225432	2.41974e-05	8.84848e-06	1.1371e-06	0.282514	5.33738e-05	-3.43185	1.9014
BB#7-17	1.37818	6.02931e-05	5.76926e-06	2.38817e-06	3.66942e-07	0.282415	1.96017e-05	-6.91399	0.727719
BB#7-18	1.39589	6.16211e-05	5.89389e-06	2.23717e-06	2.78967e-07	0.282425	2.08725e-05	-6.56859	0.770698
BB#7-19	0.491045	0.000161498	1.72762e-05	6.21116e-06	8.82461e-07	0.28253	4.25441e-05	-2.84812	1.52143
BB#7-20	0.398925	0.000207425	2.0784e-05	8.24116e-06	9.47151e-07	0.282587	5.15176e-05	-0.813678	1.83619
BB#7-21	0.380569	0.000222915	2.17024e-05	8.69157e-06	1.04784e-06	0.282573	4.97671e-05	-1.34293	1.77471
BB#7-22	1.70506	4.57721e-05	4.59095e-06	1.8833e-06	2.53769e-07	0.282437	1.6304e-05	-6.1288	0.61752
BB#7-23	1.30389	7.17108e-05	6.52719e-06	3.19074e-06	2.91317e-07	0.282485	2.24972e-05	-4.42472	0.825963
BB#7-24	1.20733	7.31214e-05	7.1463e-06	2.83707e-06	3.72017e-07	0.282446	2.04091e-05	-5.80869	0.755005
BB#7-25	1.58572	5.33421e-05	5.13776e-06	2.48612e-06	2.53988e-07	0.282451	1.90322e-05	-5.62529	0.708546
BB#7-26	2.05009	3.99026e-05	3.7718e-06	1.75815e-06	2.10074e-07	0.282406	1.62212e-05	-7.22009	0.614777
BB#7-27	1.51278	5.07708e-05	5.10446e-06	2.26e-06	2.97031e-07	0.282418	2.01804e-05	-6.80834	0.747262
BB#7-28	1.67221	4.51935e-05	5.13622e-06	1.85268e-06	2.66753e-07	0.282426	1.87601e-05	-6.52584	0.699397
BB#7-29	1.25864	6.36645e-05	7.06466e-06	2.3789e-06	3.49849e-07	0.282423	2.15421e-05	-6.64688	0.793433
19MP-01	0.453092	0.000806305	1.83799e-05	3.69418e-05	9.1489e-07	0.282428	4.65904e-05	-8.6696	1.65347
19MP-02	0.261847	0.00049353	3.20839e-05	2.27566e-05	1.63621e-06	0.282449	6.51103e-05	-7.91562	2.30715
19MP-03	0.409636	0.000616685	2.32917e-05	2.55852e-05	1.09755e-06	0.282432	4.33793e-05	-8.5262	1.54026
19MP-04	0.314015	0.000501309	2.82695e-05	2.28855e-05	1.36218e-06	0.282519	5.73182e-05	-5.43929	2.032
19MP-05	0.288577	0.00133202	2.95205e-05	5.41873e-05	1.59657e-06	0.282499	6.05965e-05	-6.14387	2.14774
19MP-06	0.348411	0.000593791	2.24102e-05	2.86119e-05	1.36601e-06	0.28245	5.52303e-05	-7.86957	1.9583
19MP-07	0.315703	0.00116182	2.578e-05	4.84535e-05	1.3572e-06	0.282471	6.52383e-05	-7.14798	2.31166
19MP-08	0.450751	0.000921886	1.92846e-05	3.68218e-05	9.82619e-07	0.282443	4.74273e-05	-8.13988	1.68298
19MP-09	0.265957	0.000626577	3.02539e-05	2.76692e-05	1.67861e-06	0.282574	6.95547e-05	-3.49905	2.46414
19MP-10	0.374603	0.000537103	2.42734e-05	2.62794e-05	1.22207e-06	0.282403	4.96047e-05	-9.53882	1.75978
19MP-11	0.243593	0.000574348	3.47544e-05	2.6882e-05	1.68513e-06	0.282526	7.71219e-05	-5.1847	2.73149
19MP-12	0.404836	0.000723038	2.03543e-05	3.04815e-05	1.01569e-06	0.282427	5.10639e-05	-8.70047	1.81127
19MP-13	0.856937	0.000572813	9.66583e-06	2.26077e-05	4.8622e-07	0.282351	3.03031e-05	-11.3734	1.08008
19MP-14	0.213995	0.00442014	0.000722587	0.000133144	1.81378e-05	0.282592	9.40578e-05	-2.88569	3.33004
19MP-15	0.519704	0.000622445	1.54236e-05	2.52444e-05	7.99171e-07	0.282427	3.98667e-05	-8.69879	1.41649
19MP-16	0.512753	0.000709912	1.6663e-05	2.84971e-05	8.53939e-07	0.282428	3.9849e-05	-8.65613	1.41586
19MP-17	0.267669	0.00147793	3.22174e-05	6.40543e-05	1.5935e-06	0.282535	6.69375e-05	-4.88077	2.37168
19MP-18	0.372577	0.0022284	0.000411188	7.06055e-05	1.12909e-05	0.282385	5.5062e-05	-10.1808	1.95235
19MP-19	0.209798	0.000840215	3.95045e-05	4.03725e-05	1.96302e-06	0.282564	8.27398e-05	-3.8313	2.93002
19MP-20	0.179721	0.00221971	5.25147e-05	9.41436e-05	2.47634e-06	0.2826	9.9893e-05	-2.57191	3.53632
19MP-21	0.297863	0.00070224	2.84063e-05	3.02608e-05	1.36245e-06	0.282497	6.64281e-05	-6.2311	2.35369
19MP-22	0.401051	0.00097783	2.23477e-05	4.04194e-05	1.07372e-06	0.282424	5.1912e-05	-8.79715	1.84119
19MP-23	0.224705	0.00112865	3.5574e-05	4.78423e-05	2.00258e-06	0.282587	6.9727e-05	-3.04868	2.47022
19MP-24	0.380501	0.00096525	2.14683e-05	3.83457e-05	1.09677e-06	0.28243	5.33555e-05	-8.57454	1.89212
19MP-25	0.323998	0.00107908	2.83185e-05	4.28611e-05	1.38995e-06	0.282545	6.0999e-05	-4.51181	2.16196
19MP-26	0.594193	0.000981218	1.45274e-05	4.0393e-05	7.693e-07	0.282434	3.77831e-05	-8.45003	1.34311
19MP-27	0.318048	0.00143089	3.77335e-05	5.70014e-05	1.75836e-06	0.282541	5.70921e-05	-4.68114	2.02401
19MP-28	0.286397	0.00202241	3.01003e-05	8.30303e-05	1.5919e-06	0.282496	7.01389e-05	-6.25354	2.48476
19MP-29	0.180311	0.0017135	4.62116e-05	7.31154e-05	2.3428e-06	0.282659	9.53625e-05	-0.491415	3.37617
19MP-30	0.379673	0.00310093	0.000209247	9.63827e-05	5.74587e-06	0.282443	6.17448e-05	-8.14887	2.18827
19GX-01	0.228851	0.000363713	3.74954e-05	1.38778e-05	2.03174e-06	0.282614	7.78292e-05	-3.4048	2.75437
19GX-02	0.197658	0.000516716	4.27957e-05	1.81e-05	2.05698e-06	0.28266	8.80928e-05	-1.77782	3.11725
19GX-03	0.312419	0.00032596	2.63593e-05	1.34799e-05	1.3301e-06	0.28252	5.77403e-05	-6.73326	2.04427
19GX-04	0.282492	0.00029867	2.80541e-05	1.14791e-05	1.4188e-06	0.28259	6.42359e-05	-4.23425	2.27385
19GX-05	0.232723	0.000438112	4.20506e-05	1.71144e-05	1.79111e-06	0.282606	8.31691e-05	-3.68014	2.94316
19GX-06	0.221314	0.000499514	3.9213e-05	1.8889e-05	2.0513e-06	0.282606	9.04079e-05	-3.68641	3.19911
19GX-07	0.222945	0.000449678	3.46422e-05	1.7718e-05	1.97821e-06	0.2827	8.04522e-05	-0.357724	2.84711
19GX-08	0.192615	0.000478261	4.55446e-05	1.86235e-05	2.18758e-06	0.282762	8.63258e-05	1.84718	3.05477
19GX-09	0.396801	0.000269228	2.11727e-05	1.02134e-05	1.04037e-06	0.282553	4.86495e-05	-5.56184	1.72307
19GX-10	0.305432	0.000352642	2.84819e-05	1.42968e-05	1.3912e-06	0.282566	6.28373e-05	-5.10188	2.22441
19GX-11	0.368958	0.000299682	2.47623e-05	1.16938e-05	1.0326e-06	0.282517	5.77836e-05	-6.81295	2.0458
19GX-12	0.363475	0.000274798	2.40641e-05	1.09164e-05	1.15844e-06	0.282516	5.2228e-05	-6.85049	1.84949
19GX-13	0.281831	0.000474815	3.1655e-05	1.98332e-05	1.54297e-06	0.282607	6.41097e-05	-3.6382	2.26938
19GX-14	0.292988	0.000428114	2.64089e-05	1.78015e-05	1.53372e-06	0.282538	6.3965e-05	-6.10014	2.26427
19GX-15	0.190757	0.000567567	4.33757e-05	2.50896e-05	2.08137e-06	0.282604	9.43926e-05	-3.75909	3.34
19GX-16	0.256531	0.000384585	3.19852e-05	1.69469e-05	1.65624e-06	0.282556	7.38695e-05	-5.43116	2.61438
19GX-17	0.211173	0.000525197	4.50344e-05	2.21845e-05	2.09691e-06	0.282585	8.5968e-05	-4.41642	3.04212
19GX-18	0.200001	0.000495869	4.05039e-05	2.17525e-05	2.14103e-06	0.282668	9.23931e-05	-1.47255	3.2693
19GX-19	0.24179	0.000420726	2.9898e-05	1.75499e-05	1.91296e-06	0.282554	7.83292e-05	-5.53364	2.77205
19GX-20	0.310207	0.000417352	2.75119e-05	1.82118e-05	1.5996e-06	0.282498	6.00927e-05	-7.49589	2.12741
19GX-21	0.21506	0.000527355	3.8612e-05	2.30776e-05	1.93264e-06	0.282624	7.89719e-05	-3.05283	2.79477
19GX-22	0.372681	0.000335161	3.03296e-05	1.21461e-05	1.27417e-06	0.282466	4.87826e-05	-8.63519	1.72777
19GX-23	0.318247	0.000356491	2.6634e-05	1.51786e-05	1.34464e-06	0.282484	5.76915e-05	-8.00011	2.04255
19GX-24	0.399263	0.000318362	2.46196e-05	1.1263e-05	1.17095e-06	0.282495	5.24812e-05	-7.59335	1.85844
19GX-25	0.249946	0.000389453	3.36676e-05	1.71416e-05	1.87354e-06	0.282574	7.29941e-05	-4.82595	2.58343
19GX-26	0.219713	0.000431528	3.80668e-05	1.81514e-05	1.88429e-06	0.282596	8.04767e-05	-4.02425	2.84797
19GX-27	0.232518	0.000460103	4.03618e-05	1.75654e-05	1.86825e-06	0.28255	7.69026e-05	-5.6572	2.72161
19GX-28	0.519033	0.000199968	1.73086e-05	8.40881e-06	8.02659e-07	0.282466	3.86796e-05	-8.62681	1.37098
19GX-29	0.486726	0.000223394	1.75496e-05	8.92083e-06	9.39463e-07	0.282458	3.96657e-05	-8.91445	1.4058
19GX-30	0.289643	0.000328793	2.91906e-05	1.23311e-05	1.59998e-06	0.282594	6.69627e-05	-4.1012	2.37023
Y724-01	0.222692	0.00106403	3.77237e-05	4.46082e-05	1.83288e-06	0.282796	7.87223e-05	2.56237	2.78521
Y724-02	0.285383	0.000787674	2.88569e-05	3.18985e-05	1.50865e-06	0.282689	5.97262e-05	-1.23469	2.11355
Y724-03	0.252119	0.000707146	3.63209e-05	2.79695e-05	1.68566e-06	0.282789	7.27806e-05	2.31998	2.57511
Y724-04	0.348436	0.0281954	0.00366209	0.000845834	0.000100478	0.282703	5.76736e-05	-0.786524	2.04094
Y724-05	0.299571	0.000871157	3.29155e-05	3.49724e-05	1.46064e-06	0.28283	6.63623e-05	3.77257	2.34817
Y724-06	0.336985	0.000753875	2.57052e-05	3.00968e-05	1.08993e-06	0.282826	5.64799e-05	3.62658	1.99879
Y724-07	0.288385	0.000740653	3.2019e-05	3.14746e-05	1.50386e-06	0.282825	6.42796e-05	3.5893	2.27454
Y724-08	0.365475	0.000931276	0.000110299	3.49705e-05	3.12181e-06	0.282788	5.19592e-05	2.28796	1.83899
Y724-09	0.361756	0.000769555	2.54188e-05	3.11328e-05	1.17122e-06	0.28282	5.56325e-05	3.40171	1.96883
Y724-10	0.190761	0.00136931	5.32741e-05	5.59264e-05	2.70726e-06	0.28308	9.00195e-05	12.6085	3.18469
Y724-11	0.226053	0.0010234	5.52684e-05	4.13833e-05	2.15017e-06	0.282898	8.06691e-05	6.14834	2.85404
Y724-12	0.303092	0.0020391	6.49188e-05	6.37707e-05	1.90214e-06	0.28287	6.26078e-05	5.17853	2.21543
Y724-13	0.320393	0.00324859	0.000279666	0.000115897	9.77697e-06	0.282883	5.00689e-05	5.61862	1.77216
Y724-14	0.333858	0.000910452	4.02514e-05	3.41835e-05	1.66241e-06	0.282847	6.23511e-05	4.34596	2.20635
Y724-15	0.443935	0.000677457	2.4169e-05	2.56842e-05	1.23085e-06	0.282769	4.35082e-05	1.61368	1.5403
Y724-16	0.448578	0.00155468	0.000115401	4.49664e-05	3.05041e-06	0.28269	5.27961e-05	-1.20865	1.86857
Y724-17	0.240591	0.000953584	3.67952e-05	4.09902e-05	2.06135e-06	0.282776	7.00596e-05	1.86231	2.4789
Y724-18	0.288454	0.000938544	3.05566e-05	3.73181e-05	1.36707e-06	0.282706	6.64308e-05	-0.632303	2.35059
Y724-19	0.230439	0.00172838	4.01123e-05	7.33477e-05	1.75363e-06	0.282835	8.23537e-05	3.93971	2.91361
Y724-20	0.345623	0.00258492	0.000118546	7.52813e-05	3.3632e-06	0.282779	5.76243e-05	1.9538	2.03924
Y724-21	0.293062	0.00277193	9.5594e-05	7.93213e-05	2.49242e-06	0.282854	6.49621e-05	4.61996	2.29867
Y724-22	0.287467	0.0016388	7.81758e-05	6.06884e-05	2.24541e-06	0.282767	6.23542e-05	1.52524	2.20646
Y724-23	0.312564	0.00104276	3.282e-05	4.14087e-05	1.3216e-06	0.282831	5.96525e-05	3.78677	2.11095
Y724-24	0.335031	0.00839484	0.000414642	0.000212088	1.01483e-05	0.28276	5.29407e-05	1.27687	1.87367
Y724-25	0.328585	0.0168014	0.00222223	0.00042803	5.79556e-05	0.282795	5.95272e-05	2.50641	2.1065
Y724-26	0.342466	0.00426917	0.000507884	0.000110884	1.12473e-05	0.282763	5.7702e-05	1.39767	2.04199
Y724-27	0.361684	0.033356	0.002081	0.00106298	6.54895e-05	0.282621	6.27552e-05	-3.67419	2.22058
Y724-28	0.289443	0.00234117	0.000442591	6.95542e-05	1.08872e-05	0.282902	5.59778e-05	6.31654	1.98104
Y724-29	0.203577	0.00091676	4.11259e-05	3.49504e-05	2.30801e-06	0.28306	9.25482e-05	11.9041	3.27411
Y724-30	0.272384	0.00102721	2.86204e-05	4.42315e-05	1.54979e-06	0.282893	6.38827e-05	5.9758	2.2605
Note:
a. “V” represents the signal intensity. The reading of 1 V corresponds to ~ 9.0 * 105 cps.
